# Supplementary material for: Lignin oxidation and depolymerisation in ionic liquids
Source: Royal Society of Chemistry journal article supplement (doi:10.1039/c5gc01950h), 2015-09-21
Supplement: c5gc01950h1.pdf [file c5gc01950h1.pdf]

## 1 IL characterization

The synthesised ILs were characterized by ATR-IR and  $^1\text{H-NMR}$ , before and after the whole process to evaluate their possible reutilization.

### 1.1 $[\text{HC}_4\text{im}][\text{HSO}_4]$

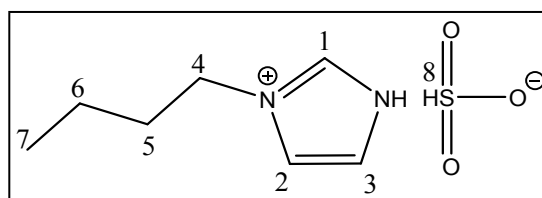

Figure 1:  $[\text{HC}_4\text{im}][\text{HSO}_4]$  chemical structure

$[\text{HC}_4\text{im}][\text{HSO}_4]$  was prepared by the direct combination of 1-butylimidazole and  $\text{H}_2\text{SO}_4$ . During the  $[\text{HC}_4\text{im}][\text{HSO}_4]$  synthesis special attention was paid to maintaining the 1:1 ratio of the reactants, so the  $\text{H}_2\text{SO}_4$  was titrated before use. The reaction was cooled in a dry ice bath, due to the highly exothermic reaction. The  $[\text{HC}_4\text{im}][\text{HSO}_4]$  was dried for several hours under vacuum reaching a moisture content of 2%. The  $[\text{HC}_4\text{im}][\text{HSO}_4]$  is a salmon liquid at room temperature. It was characterized by  $^1\text{H-NMR}$  and ATR-IR.

Figure 2 shows the spectra of the freshly prepared  $[\text{HC}_4\text{im}][\text{HSO}_4]$  and after the treatment with the different concentrations of  $\text{H}_2\text{O}_2$ . The spectral bands of the pure  $[\text{HC}_4\text{im}][\text{HSO}_4]$  were assigned as follows (Fig. 1): 0.88 (m)  $\text{CH}_3$  (7), 1.22 (m) ppm  $\text{CH}_2$  (6), 1.76 (pt) ppm (q)  $\text{CH}_2$  (5), 2.51 ppm (dt) DMSO, 4.21 ppm (t)  $\text{CH}_2$  (4), 7.65 ppm (t) CH (2), 7.79 ppm (t) CH (3), 9.11 ppm (t) CH (1) and 11.57 ppm  $\text{HSO}_4$  (8). After oxidation treatments it was observed that the IL was oxidizing and the oxidation was higher with the increase of concentration of  $\text{H}_2\text{O}_2$ , a band assigned to acidic water was displaced from 9.5 to 10 and other small bands appeared at higher displacements, due to the OH groups formed by the oxidation.

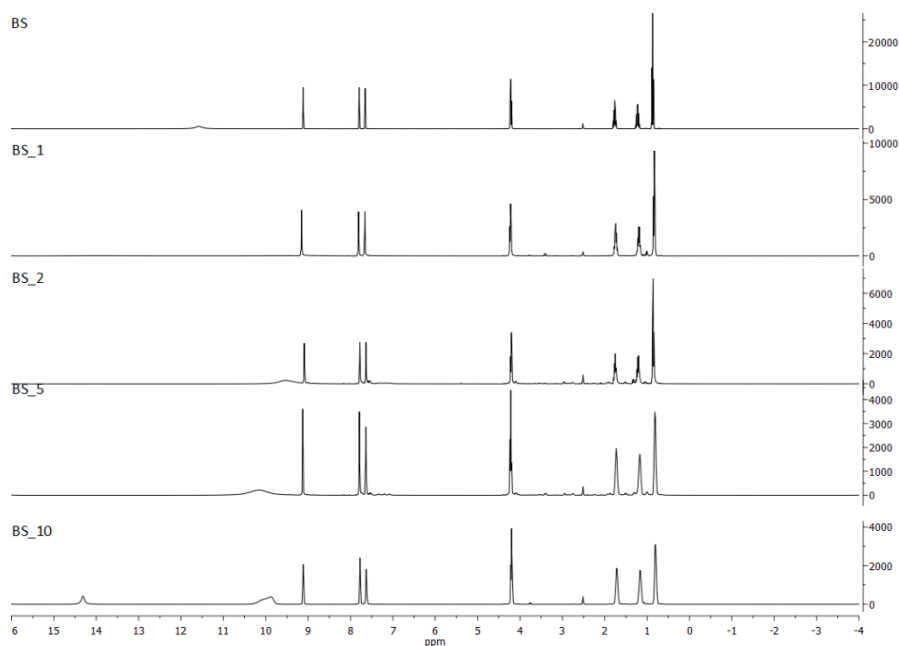

**Figure 2: <sup>1</sup>H-NMR of [HC<sub>4</sub>im][HSO<sub>4</sub>]**

Figure 3 shows ATR-IR spectra of [HC<sub>4</sub>im][HSO<sub>4</sub>] before and after the treatment. The bands were assigned as follows to the pure [HC<sub>4</sub>im][HSO<sub>4</sub>]: bands at 3138 and 3065 cm<sup>-1</sup> were assigned to asymmetric and symmetric stretching vibrations of CH in the imidazolium ring, bands at 2962, 2935 and 2874 cm<sup>-1</sup> were assigned to stretching vibration of CH<sub>2</sub> and CH<sub>3</sub> in butyl chain, bands at 1580, 1548 and 1514 cm<sup>-1</sup> were assigned to C-C and C-N vibrations of the ring, the band at 1463 cm<sup>-1</sup> was assigned to NH deformation vibration, bands at 1408, 1159 and 1028 cm<sup>-1</sup> were assigned to HOSO<sub>3</sub><sup>-</sup> stretching vibrations, the band at 1087 cm<sup>-1</sup> was assigned to the plane wagging vibration of the alkyl chain with the ring, and the band at 838 cm<sup>-1</sup> was assigned to CH in-plane vibration.

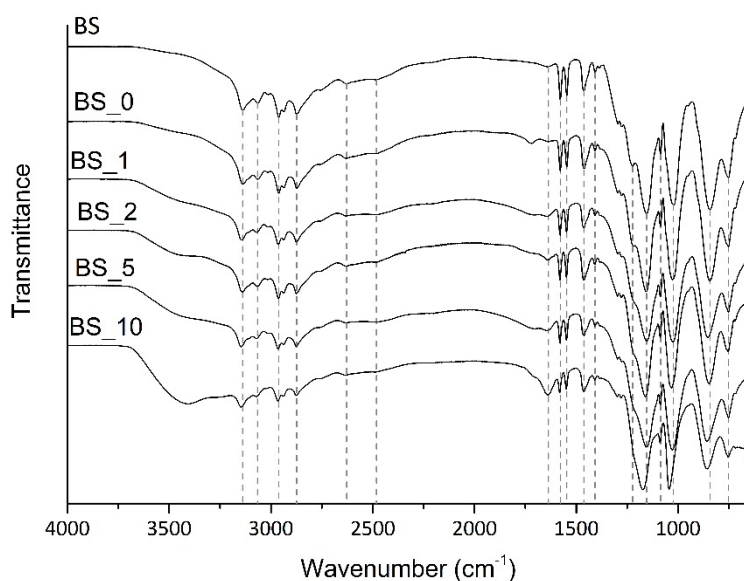

Figure 3: ATR-IR spectrum of BHimHSO<sub>4</sub>

## 1.2 [Et<sub>3</sub>NH][HSO<sub>4</sub>]

[Et<sub>3</sub>NH][HSO<sub>4</sub>] was prepared by the direct combination of triethylamine and H<sub>2</sub>SO<sub>4</sub>. During [Et<sub>3</sub>NH][HSO<sub>4</sub>] synthesis special attention was paid to maintaining the 1:1 ratio of the reactants, so the H<sub>2</sub>SO<sub>4</sub> was titrated before use and it has to be 5M to avoid solidification. The resultant ionic liquid was dried under vacuum for several hours until the moisture content was lower than 2%. The appearance of the ionic liquid was a white solid at room temperature. It was characterized by <sup>1</sup>H-NMR and ATR-IR.

The <sup>1</sup>H-NMR spectrum did not show any impurity (Fig. 4), bands were assigned as follows: 1.18 ppm (t) CH<sub>3</sub>, 3.06 (q) ppm CH<sub>2</sub>, 2.51 ppm (dt) DMSO, and 9.41 ppm (s) HSO<sub>4</sub>, there was no evidence of new bands after oxidation treatment.

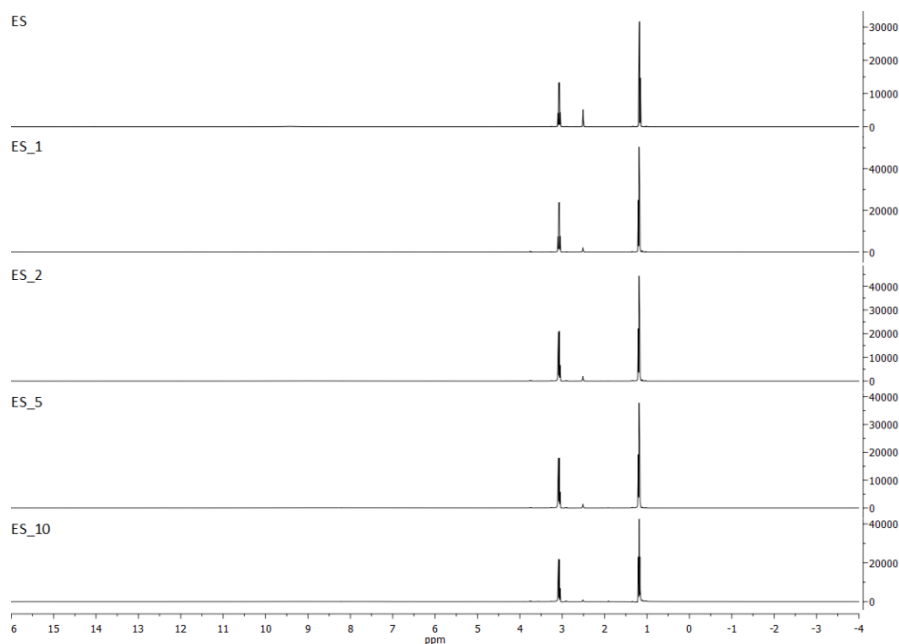

**Figure 4:  $^1\text{H-NMR}$  22 h pretreatment  $[\text{Et}_3\text{NH}][\text{HSO}_4]$  after  $\text{H}_2\text{O}_2$  treatment**

Figure 5 shows the ATR-IR spectra of  $[\text{Et}_3\text{NH}][\text{HSO}_4]$  before and after the treatment. All spectra showed the same main bands, that were assigned as follows; bands at  $3138$  and  $3065\text{ cm}^{-1}$  were assigned to asymmetric and symmetric stretching vibrations of CH in the imidazolium ring, bands at  $2962$ ,  $2935$  and  $2874\text{ cm}^{-1}$  were assigned to stretching vibration of  $\text{CH}_2$  and  $\text{CH}_3$  in butyl chain, bands at  $1580$ ,  $1548$  and  $1514\text{ cm}^{-1}$  were assigned to C-C and C-N vibrations of the ring, the band at  $1463\text{ cm}^{-1}$  was assigned to NH deformation vibration, bands at  $1408$ ,  $1159$  and  $1028\text{ cm}^{-1}$  were assigned to  $\text{HOSO}_3^-$  stretching vibrations, the band at  $1087\text{ cm}^{-1}$  was assigned to the plane wagging vibration of the alkyl chain with the ring, and the band at  $838\text{ cm}^{-1}$  was assigned to CH in plane vibration. For spectra after pretreatment and treatment the same impurities bands were observed, those new bands were assigned as follows; at  $1737$  and  $1647\text{ cm}^{-1}$  which were assigned to absorption of moisture and  $1217\text{ cm}^{-1}$  assigned to CH and OH groups deformation, it seemed that after treatment the only impurity was the presence of water.

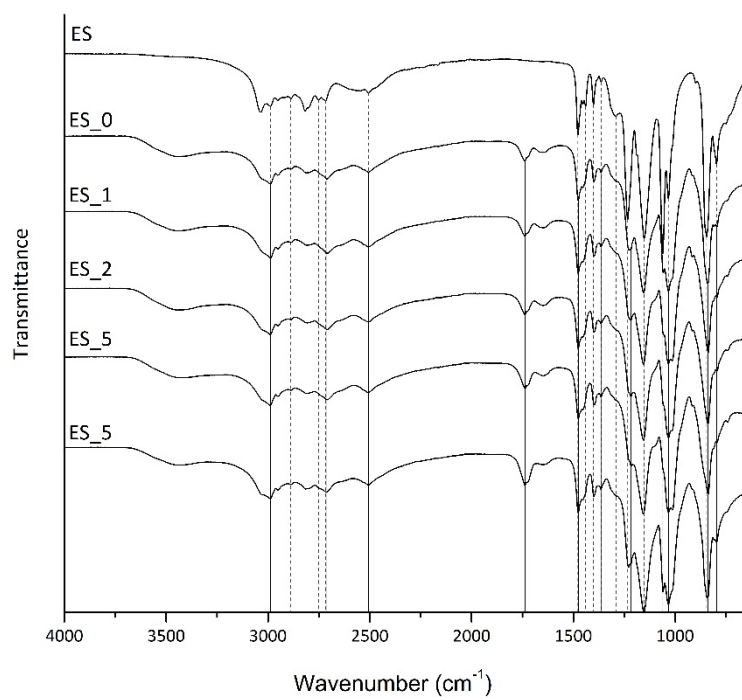

Figure 5: ATR-IR spectra of  $[\text{Et}_3\text{NH}][\text{HSO}_4]$  after treatment with  $\text{H}_2\text{O}_2$  and pretreatment
